# Supplementary material for: Perihilar cholangiocarcinoma masquerading as intrahepatic cholestasis of pregnancy: a case report and review of the literature
Source: Front Med (Lausanne). 2024 Oct 23;11:1449865. doi: 10.3389/fmed.2024.1449865 (PMC11566451; doi:10.3389/fmed.2024.1449865)
Supplement: SUPPLEMENTARY TABLE 1 — Cholangiocarcinoma diagnosed in pregnancy. [file Table_1.XLSX]

## Sheet: Sheet2
Clinical Features	(Xiao C et al.)	(Das S et al.)	(Pencovich N et al.)	(Francis AP )	(Qasrawi et al.)	(Gerli S ea al.)	(Wiesweg M ea al.)	(Goswami et al.)	Pengfei Zhang et al.	(Sadoon S et al.)	(Marasinghe JP et al.)	(Balderston KD et al.)	(Zelissen PM et al.)	(Balderston KD et al.)	(Devoe LD et al.)	Purtilo DT et al.)
Published year	2023	2019	2019	2018	2018	2015	2014	2014	2013	2008	2008	1998	1986	1985	1983	1975	1975
Age	33	28	30	36	38	30	38	22	31	39	32	23	26	26	NA	25	34
Obstetric history	4th	NA	2nd	3rd	4th	1st	2nd	NA	NA	3rd	3rd	1st	1st	NA	NA	NA	9th
Termination of pregnancy(mode/weeks/reason)	VD/224/7/Induciton	VD/33/NA	VD/38/Natural	VD/303/7/preeclampsia	CS/36/AFLP	CS/31/Pain	CS/35/Elective	VD/full-term/No	CS/32/No	CS/35/Elective	CS/18/Failed induction	CS/26/HELLP	NA	VD/35/Induction	NA	VD/7th month/breech stillbirth	NA
Symptoms	Pruritis(feet and palms)	RUQ pain Emesis,fever	NA	Nausea,emesis Fatigue, anorexia	RUQ pain DU	RUQ pain	Back pain,BABD Saddle anesthesia	Abdominal pain, Weight loss, fever	RUQ pain	Pruritis(feet and palms)	RUQ pain,nausea, Emesis,DU,fever	Abdominal pain Emesis	NA	Abdominal pain Pruritus,weight loss	NA	Pain in eyes Emesis,nausea	Anorexia Abdominal pain
Symptom onset(GW)	19	20	NA	23	36	30	15	2 weeks post-partum	20	26	16	26	NA	22	NA	7th month	NA
Abnormal examination findings	Jaundice	Palpable hard liver Jaundice	Palpable mass at the upper abdomen	Jaundice	Palpable liver, jaundice	NA	NA	RUQ mass, jaundice	RUQ mass	No hepapomegaly	Palpable liver and gallbladder, jaundice	RUQ mass, jaundice High blood pressure	NA	Jaundice	NA	Postpartum purpura	Enlargement of epigastrium
Onset of jaundice(GW)	21	20	NA	23	36	NA	NA	2 weeks postpartum	NA	31	16	26	NA	20	NA	NA	NA
Laboratory investigations (Reference range):
Total bilirubin in mg/dL (0.5-1)	22.9	0.5	NA	NA	6.4	NA	NA	17.3	18	NA	271.94umol/L	3.6→5.1	NA	12.5	NA	NA	5.7
Direct bilirubin in mg/dL	19	0.35	NA	NA	5	NA	NA	10.5	6.3	NA	262umol/L	NA	NA	7.5	NA	NA	3
Aspartate Aminotransferase in Units/L (8-40)	75	48	NA	worsening	83	Normal	NA	95	62	Raised	NA	70	NA	35	NA	NA	NA
Alanine Aminotransferase in Units/L (5-35)	139	31	NA	worsening	87	Normal	NA	70	25	Raised	76	31	NA	33	NA	NA	NA
Alkaline Phosphatase in Units/L (40-125)	530	302	147	NA	319	NA	NA	680	NA	NA	2164	NA	NA	370	NA	NA	8.5
Prothrombin Time with International Normalized ratio in seconds (11-13.5)	9.2and NA	NA	NA	NA	17 and 1.4	NA	NA	NA	NA	NA	18 and 1.58	NA and 1.8	NA	NA	NA	NA	NA
Alpha-fetoprotein (IU/ml)(<5)	9.21	29.6	1800ng/ml	NA	1135ng/ml	NA	NA	NA	246.2ng/ml	Normal	NA	Normal	NA	NA	NA	NA	NA
Hepatitis B surface antigen	Negative	Negative	Negative	NA	Negative	Negative	NA	NA	NA	Negative	Negative	Negative	NA	NA	NA	NA	NA
Hepatitis C antibody	Negative	Negative	Negative	NA	Negative	Negative	NA	NA	NA	Negative	Negative	Negative	NA	NA	NA	NA	NA
Imaging:
Ultrasound	Dilatation of intrahepatic bile ducts	Not done	Heterogeneous lesion within the left lobe,10cm in diameter	Not done	Hepatomegaly with liver mass	Right hepatic leison（10.5cm×8.5cm）	Breast checked negative	Dilated CBD with filling defect	Occupation in the liver	Large solid central hepatic tumour	Intrahepatic lesion,dilatation of intrahepatic bile ducts	Liver mass lesion	Not done	Intrahepatic biliary dilatation	NA	Not done	Not done
Computed Tomography	Not done	Hepatomegaly with multiple liver lesions;Multiple lung nodules;lumbar vertebra lytic lesion;ELLN	Not done	No obstruction	NA	Not done	Thoracic CT scaned negative	Intramural lesions in CBD, dilated gallbladder and CBD	Multiple low-density foci in the liver, multiple ELLN		Not done	Not done	Not done	Not done	NA	Not done	Coin lesions
Magnetic Resonance Imaging	2.0X1.4cm lesion at left and right hepatic ducts confluence distributed along the bile ducts;Dilatation of bile ducts	Not done	8.5×9cm lesion within liver segments II, III and IV, penetrating into segment VIII.	Large bilateral adnexal masses	Mass lesions in the liver; intrahepatic biliary dilation	right hepatic leison （13cm×9cm）	Hepatic lesion（7.4cm×6cm）	NA	Hepatomegaly,Partial lesion of the left lobe of the liver fused	Central malignant tumour	Intrahepatic mass lesion with hyperintense edge(8cm×8.5cm ),dilatation of intrahepatic ducts	Not done	Not done	Not done	NA	Not done	Not done
Endoscopic Retrograde Cholangio-Pancreatography	Not done	Not done	Not done	Not done	Not done	Not done	Not done	Dilated CBD with obstruction		Not done	Not done	Right sided hepatic tumor;constriction of right biliary system and CBD	Not done	Not done	NA	Not done	Not done
Diagnosis method	Open surgery	Biopsy	Biopsy	Biopsy	Biopsy	right hepatectomy during CS	Histopathological test of bone tumor,Imageological scan	Endoscopic biopsy	Biopsy	NA	Laparotomy biopsy	Open biopsy	NA	NA	NA	Necropsy	Necropsy
Treatment	Middle hepatectomy ,cholangioplasty,cholejunostomy	Capecitabine	Extended left hepatectomy at 30 gestianal weeks	Gemcitabine	Gemcitabine	Chemotherapy and surgery	Gemcitabine and cisplatin,radiotherapy,5FU,oxaliplatin,paclitaxel,epirubicin	Placed two plastic biliary stents	Gemcitabine and cisplatin	Chemotherapy and surgery	Chemotherapy	NA	Chemotherapy(APD) and surgery(removal tomor)	NA	NA	Died of meningiococcemia	Hysterectomy and bilateral salpingo-oophorectomy
Outcome	Died 26 months after diagnosis	NA	NA	Died 17 months after diagnosis	Died 6 months after diagnosis	Died 6 months after diagnosis	Died 14 months after diagnosis	NA	NA	Survival more than 4 years	Died 2 months after diagnosis	Died 3 weeks after diagnosis	NA	Surviving more than 4 months	NA	Died postpartum,no details information	Died after 21 days of hospitalization
Symptom duration not available; NA-Details not available; CBD-Common Bile Duct; RUQ-right upper quadrant;CS-ceasearen section;VD-vaginal delivery;AFLP-acute fatty liver of pregnancy; BABD-bowel and bladder dysfunction;DU-dark urine;GW-gestation weeks;ELLN-Enlarged lymph nodes;
